# Supplementary material for: Beyond the regulatory radar: knowledge and practices of rural medical practitioners in Bangladesh
Source: Springer Nature journal article supplement (doi:10.1186/s12913-023-10317-w), 2023-11-30
Supplement: MOESM1 [file 26474278]

## Additional File 1. Questionnaire used to collect data

### Part 1. Information on Socio-Demographics:

1. Respondent's ID:
2. Age (years): \_\_\_\_\_
3. Sex:  Male  Female
4. Address: Village: \_\_\_\_\_  
Union: \_\_\_\_\_  
Upazilla: \_\_\_\_\_  
District: \_\_\_\_\_
5. Education  
 Below SSC/secondary school (please specify years of schooling) \_\_\_\_\_  
 SSC/ Secondary school or equivalent  
 HSC/ Higher secondary school or equivalent  
 Bachelor (please mention the subject of study) \_\_\_\_\_  
 Masters (please mention the subject of study) \_\_\_\_\_
6. Professional qualification (multiple response allowed)  
 LMAF  BRMP  DMF/MATS  Paramedical  
 Palli Chikitshok (PC)  Others (Please specify) \_\_\_\_\_
7. Duration of practice (in year): \_\_\_\_\_
8. Rank the following diseases on a scale of 1-10 depending on your encounter  
(the disease you encounter most should be ranked 1, and the least should be ranked 10)  
Diarrhoea \_\_\_\_\_  
Diabetes \_\_\_\_\_  
Common cold \_\_\_\_\_

Hypertension \_\_\_\_\_

Pneumonia \_\_\_\_\_

Asthma \_\_\_\_\_

Typhoid \_\_\_\_\_

Trauma \_\_\_\_\_

UTI \_\_\_\_\_

Others \_\_\_\_\_ please specify \_\_\_\_\_

9. What are the tools you have now in your chamber for consulting with a patient?

(multiple response)

Stethoscope       BP machine       Weight machine       Torch

Thermometer       Nebulizer       Glucometer

Surgical instruments for stitching       Arrangement for handwashing

## Part 2. Practice pattern of rural medical practitioners

1. Where do you usually consult patients?

- Own chamber     Own drugstore     Other's drugstore     Own house  
 Others (please specify)\_\_\_\_\_

2. How many patients do you consult on average in a day? \_\_\_\_\_

3. How do you treat common cold?

- I do not prescribe antibiotics for common cold  
 I prescribe a single antibiotic (please specify)\_\_\_\_\_  
 I prescribe multiple antibiotics (please specify)\_\_\_\_\_

4. Which of the following are the signs of pneumonia (multiple response possible)

- Cough     Difficulty breathing     Fast breathing     Fever  
 Chest indrawing     Other (please specify)\_\_\_\_\_

5. How do you treat pneumonia? (multiple response)

- I do not prescribe antibiotics for pneumonia  
 I prescribe antibiotics for pneumonia
- I prescribe amoxicillin as the first line of treatment
  - I prescribe ceftriaxone as the first line of treatment
  - I prescribe various antibiotics both oral and injectables (please specify)\_\_\_\_\_
- I prescribe salbutamol for pneumonia  
 I prescribe steroids for pneumonia (please specify)\_\_\_\_\_  
 I prescribe antihistamine for pneumonia  
 I prescribe other drugs for pneumonia (please specify)\_\_\_\_\_  
 I refer severe cases to hospital or qualified providers

6. Which of the following are signs of dehydration?

- Lethargic appearance     Sunken eyes     Thirsty  
 Delayed skin pinch     Others (please specify)\_\_\_\_\_

7. How do you treat diarrhoea? (multiple response)

- I prescribe ORS for diarrhoea  
 I prescribe cholera saline for diarrhoea  
 I prescribe antibiotics for diarrhoea (please specify)\_\_\_\_\_  
 I prescribe antiprotozoal for diarrhoea (please specify)\_\_\_\_\_  
 I prescribe both antibiotic and antiprotozoal together for diarrhoea  
 I prescribe antiemetic for diarrhoea (please specify)\_\_\_\_\_  
 I prescribe other drugs for diarrhoea (please specify)\_\_\_\_\_  
 I refer severe cases to hospital or qualified provider
