# Supplementary material for: Beyond the regulatory radar: knowledge and practices of rural medical practitioners in Bangladesh
Source: Springer Nature journal article supplement (doi:10.1186/s12913-023-10317-w), 2023-11-30
Supplement: MOESM2 [file 26474278]

**Additional file 2** Training courses taken by the rural medical practitioners.

| <b>Name of the training</b>                                     | <b>Duration</b>             |
|-----------------------------------------------------------------|-----------------------------|
| <b>Government approved training<sup>a</sup></b>                 |                             |
| Diploma of Medical Faculty/ Medical Assistant Training (DMF)    | 3 years                     |
| Community Health Workers (CHWs) <sup>b</sup>                    | Variable                    |
| Diploma in Dental Technology (DDT)                              | 3 years                     |
| Diploma in Intensive Care Assistant (DICA)                      | 3 years                     |
| Diploma in Medical Laboratory Technology (DMLT)                 | 3 years                     |
| Diploma in Medical Technology (Physiotherapy)(DMT)              | 3 years                     |
| Diploma in Medical Technology (Radiography) (DMT)               | 3 years                     |
| Diploma in Medical Technology (Radiotherapy) (DMT)              | 3 years                     |
| Diploma in Operation Theatre Assistant (OTA)                    | 3 years                     |
| Diploma Occupational Therapist (DOT)                            | 3 years                     |
| Diploma in Homoeopathic Medicine & Surgery (DHMS)               | 4 years                     |
| Diploma in Unani Medicine & Surgery (DUMS)                      | 4 years                     |
| <b>Training courses beyond government oversight<sup>c</sup></b> |                             |
| Local Medical Assistant & Family Planning (LAMFP)               | 6, 8, or 12 months          |
| Bangladesh Rural Medical Practitioner (BRMP)                    | 3, 6 or 12 months           |
| Certificate in Nursing                                          | 1 year                      |
| Certificate in Paramedics                                       | 1 year                      |
| Certificate in Pathology                                        | 1 or 2 years                |
| Certificate in Physiotherapy                                    | 1 or 2 years                |
| Certificate in Dentistry                                        | 1 year                      |
| Community Medical Assistant Certificate Course                  | 3, 6 or 12 months           |
| Diploma in Dentistry                                            | 3 or 4 year                 |
| Diploma in Dental Assistance                                    | 2 years                     |
| Diploma in Medical Assistance (DMA)                             | 1, 2 or 3 years             |
| Diploma in Medicine and Surgery (DMDS)                          | 4 years                     |
| Diploma in Nursing                                              | 2, 3, or 4 years            |
| Diploma in Paramedical course (DPM)                             | 2 years                     |
| Diploma in Pathology                                            | 3 or 4 years                |
| Diploma in Pharmacy                                             | 2 or 3 years                |
| Diploma in Physiotherapy                                        | 3 or 4 years                |
| Emergency Knowledge of Medical Science                          | 9 months                    |
| Local Diploma in Medical Science                                | 1 year                      |
| Pharmacy course                                                 | 3 or 6 months, 1 or 2 years |

<sup>a</sup>Personnel taking government-approved training is supposed to work within a regulatory limit. We considered personnel taking government-approved training as a rural medical practitioner, only when they worked beyond their regulatory limit and were not formally employed by the government or any non-government organization.

<sup>b</sup>Duration of the CHW training is variable depending on the cadres. Training is also provided by non-government organizations. Several cadres are included under the umbrella term of CHW, i.e., Health Assistants, Family Welfare Assistants, Community Health Care Providers, and non-government organizations' trained CHW.

<sup>c</sup>The list may not be exhaustive as these trainings are not under any monitoring.
