# Supplementary material for: Beyond the regulatory radar: knowledge and practices of rural medical practitioners in Bangladesh
Source: Springer Nature journal article supplement (doi:10.1186/s12913-023-10317-w), 2023-11-30
Supplement: MOESM3 [file 26474278]

**Additional file 3** Prescribed antibiotic in case of common cold by the rural medical practitioners.

| <b>Antibiotic prescribed (N=294) (multiple response)</b> | <b>n (%)</b> |
|----------------------------------------------------------|--------------|
| Azithromycin                                             | 153 (52.0)   |
| Amoxicillin                                              | 128 (43.5)   |
| Cefixim                                                  | 75 (25.5)    |
| Cefuroxim                                                | 44 (15.0)    |
| Ciprofloxacin                                            | 35 (11.9)    |
| Levofloxacin                                             | 26 (8.6)     |
| Doxycyclin                                               | 4 (1.4)      |
| Cephalexin                                               | 3 (1.0)      |
| Penicillin                                               | 1 (0.3)      |
| Cefpodoxime                                              | 1 (0.3)      |
| Cephradine                                               | 1 (0.3)      |
| Tetracycline                                             | 1 (0.3)      |
